# Supplementary material
Source: Springer Nature journal article supplement (https://www.springermedizin.de/resource/supplementary/12943_2011_855_MOESM3_ESM.pdf/9551856)

**A**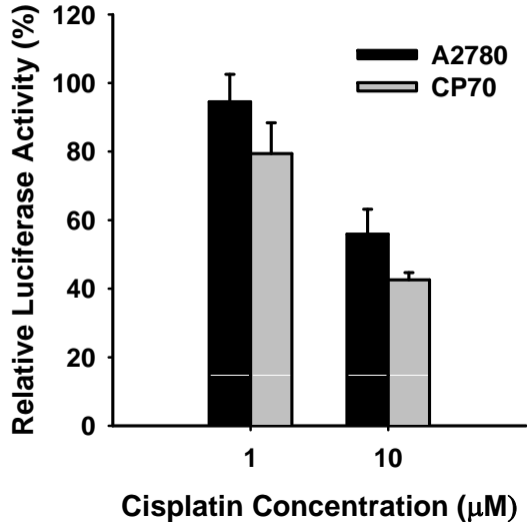**B**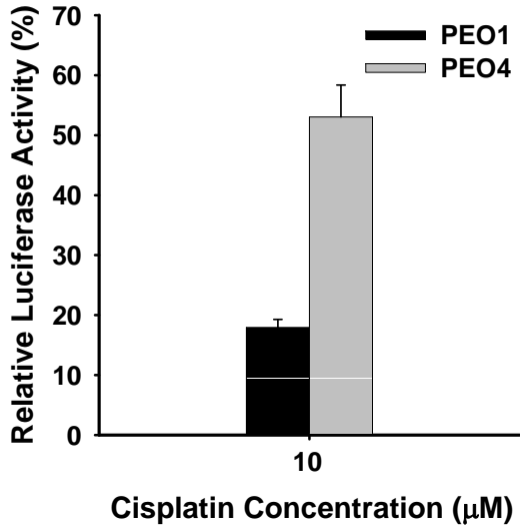

Supplement: MOESM3 [file 9551856]
